# Supplementary material
Source: HighWire-hosted journal article supplement (http://www.annfammed.org/highwire/filestream/785/field_highwire_adjunct_files/0/Huguet_Supp_Apps.pdf)
Supplement: Huguet_Supp_Apps.pdf [file Huguet_Supp_Apps.pdf]

Supplemental materials for:

Huguet N, Valenzuela S, Marino M, et al. Following uninsured patients through medicaid expansion: ambulatory care use and diagnosed conditions. *Ann Fam Med*. 2019;17(4):336-344.

**Supplemental Appendix 1: Logit coefficient of discrete overall ambulatory care utilization for each insurance group using a Poisson mixed-effects model**

| <b>Independent Variable</b>             | <b>Estimate</b> | <b>95% CI</b>  | <b>P Value</b> |
|-----------------------------------------|-----------------|----------------|----------------|
| <b>Insurance Group</b>                  |                 |                |                |
| Continuously Uninsured                  | Reference       |                |                |
| Gained Medicaid                         | 0.027           | 0.012, 0.042   | 0.001          |
| Gained Other Insurance                  | 0.205           | 0.190, 0.219   | <0.001         |
| <b>Period</b>                           |                 |                |                |
| Pre-ACA                                 | Reference       |                |                |
| Post-ACA                                | -0.052          | -0.060, -0.044 | <0.001         |
| <b>Insurance Group*Period</b>           |                 |                |                |
| Continuously Uninsured*Pre-ACA          | Reference       |                |                |
| Gained Medicaid*Post-ACA                | 0.320           | 0.308, 0.331   | <0.001         |
| Gained Other Insurance*Post-ACA         | 0.403           | 0.391, 0.414   | <0.001         |
| <b>Age in years</b>                     |                 |                |                |
| 19 – 64                                 | Reference       |                |                |
| 27 – 44                                 | 0.128           | 0.113, 0.144   | <0.001         |
| 45 – 64                                 | 0.237           | 0.221, 0.254   | <0.001         |
| <b>Race/Ethnicity</b>                   |                 |                |                |
| Non-Hispanic White                      | Reference       |                |                |
| Hispanic                                | 0.054           | 0.036, 0.072   | <0.001         |
| Other <sup>1</sup>                      | -0.031          | -0.048, -0.013 | 0.001          |
| <b>Preferred Language</b>               |                 |                |                |
| English                                 | Reference       |                |                |
| Non-English <sup>2</sup>                | 0.038           | 0.021, 0.055   | <0.001         |
| <b>Sex</b>                              |                 |                |                |
| Female                                  | Reference       |                |                |
| Male                                    | -0.149          | -0.159, -0.139 | <0.001         |
| <b>Federal Poverty Level</b>            |                 |                |                |
| ≤138%                                   | Reference       |                |                |
| >138%                                   | -0.096          | -0.111, -0.082 | <0.001         |
| No Information                          | -0.129          | -0.155, -0.104 | <0.001         |
| <b>Clinic Location</b>                  |                 |                |                |
| Rural                                   | Reference       |                |                |
| Urban                                   | -0.151          | -0.292, -0.010 | 0.035          |
| <b>Charlson Comorbidity Index Score</b> |                 |                |                |
| 0                                       | Reference       |                |                |
| ≥ 1                                     | 0.448           | 0.437, 0.459   | <0.001         |

Pre-ACA: 1/1/2012 to 12/31/2013; Post-ACA: 1/1/2014 to 12/31/2015. Visits refer to ambulatory care only. Overall ambulatory care utilization includes all billable encounters. *Continuously Uninsured*: all pre-period visits were uninsured and all post-period visits were uninsured. *Gained Medicaid*: all pre-period visits were uninsured and all post-period visits were covered by Medicaid with the following exception - to allow for time to enroll in Medicaid, the first visit post-ACA could be uninsured. *Gained Other Insurance*: all pre-period visits were uninsured and during the post-period, visits were covered by other insurance types or insurance patterns (churning).<sup>1</sup>Other includes Missing, Non-Hispanic black, and Non-Hispanic other race. <sup>2</sup>Non-English includes No Information, Other, or Spanish.

**Supplemental Appendix 2: Logit coefficient of categorical overall ambulatory care utilization (1-2, 3-5 or ≥6 visits) for each insurance group using ordinal logistic mixed-**

| Independent Variable            | Estimate  | 95% CI         | P Value |
|---------------------------------|-----------|----------------|---------|
| <b>Insurance Group</b>          |           |                |         |
| Continuously Uninsured          | Reference |                |         |
| Gained Medicaid                 | -0.046    | -0.094, 0.001  | 0.055   |
| Gained Other Insurance          | 0.390     | 0.342, 0.438   | <0.001  |
| <b>Period</b>                   |           |                |         |
| Pre-ACA                         | Reference |                |         |
| Post-ACA                        | -0.395    | -0.429, -0.360 | <0.001  |
| <b>Insurance Group*Period</b>   |           |                |         |
| Continuously Uninsured*Pre-ACA  | Reference |                |         |
| Gained Medicaid*Post-ACA        | 1.155     | 1.101, 1.208   | <0.001  |
| Gained Other Insurance*Post-ACA | 1.569     | 1.511, 1.626   | <0.001  |
| <b>Age in years</b>             |           |                |         |
| 19 – 64                         | Reference |                |         |
| 27 – 44                         | 0.371     | 0.327, 0.415   | <0.001  |
| 45 – 64                         | 0.677     | 0.630, 0.724   | <0.001  |
| <b>Race/Ethnicity</b>           |           |                |         |
| Non-Hispanic White              | Reference |                |         |
| Hispanic                        | 0.270     | 0.218, 0.323   | <0.001  |
| Other <sup>1</sup>              | -0.061    | -0.114, -0.009 | 0.023   |
| <b>Preferred Language</b>       |           |                |         |
| English                         | Reference |                |         |
| Non-English <sup>2</sup>        | 0.210     | 0.161, 0.259   | <0.001  |
| <b>Sex</b>                      |           |                |         |
| Female                          | Reference |                |         |
| Male                            | -0.421    | -0.451, -0.392 | <0.001  |
| <b>Federal Poverty Level</b>    |           |                |         |
| ≤138%                           | Reference |                |         |
| >138%                           | -0.226    | -0.267, -0.184 | <0.001  |
| No Information                  | -0.371    | -0.446, -0.296 | <0.001  |
| <b>Clinic Location</b>          |           |                |         |
| Rural                           | Reference |                |         |
| Urban                           | 0.282     | -0.028, 0.591  | 0.075   |

**Charlson Comorbidity Index Score**

|     |           |              |        |
|-----|-----------|--------------|--------|
| 0   | Reference |              |        |
| ≥ 1 | 1.277     | 1.244, 1.310 | <0.001 |

---

Pre-ACA: 1/1/2012 to 12/31/2013; Post-ACA: 1/1/2014 to 12/31/2015. Visits refer to ambulatory care only. Overall ambulatory care utilization includes all billable encounters. *Continuously Uninsured*: all pre-period visits were uninsured and all post-period visits were uninsured. *Gained Medicaid*: all pre-period visits were uninsured and all post-period visits were covered by Medicaid with the following exception - to allow for time to enroll in Medicaid, the first visit post-ACA could be uninsured. *Gained Other Insurance*: all pre-period visits were uninsured and during the post-period, visits were covered by other insurance types or insurance patterns (churning).<sup>1</sup>Other includes Missing, Non-Hispanic black, and Non-Hispanic other race. <sup>2</sup>Non-English includes No Information, Other, or Spanish.
